# Supplementary material for: Genome-wide identification of CaARR-Bs transcription factor gene family in pepper and their expression patterns under salinity stress
Source: PeerJ. 2023 Nov 1;11:e16332. doi: 10.7717/peerj.16332 (PMC10625354; doi:10.7717/peerj.16332)
Supplement: Supplemental Information 1 [file peerj-11-16332-s001.xlsx]

## Sheet: CaARR_qPCR
Well	Task	Reporter	Group	Sample Name	Target Name	CT		CT Averages
A1	UNKNOWN	FAM	Leaves	Ctrl	HKG	25.9105		Tissue	Case	GAPDH	CaARR01	CaARR02	CaARR03	CaARR04	CaARR05	CaARR06	CaARR07	CaARR08	CaARR09	CaARR10
A2	UNKNOWN	FAM	Leaves	Ctrl	HKG	25.9248		Leaves	Ctrl	26	31.2816	29.8666	31.7362	29.8091	29.5607	28.5656	28.9715	28.9715	28.9266	NCT
A3	UNKNOWN	FAM	Leaves	Ctrl	HKG	25.934		Leaves	12H	26	30.9342	30.2185	32.0606	30.0701	29.4978	29.198	28.9764	28.9764	30.4803	NCT
A4	UNKNOWN	FAM	Leaves	12H	HKG	25.9892		Leaves	24H	26	31.0652	30.2812	31.2598	29.8043	30.2615	29.372	28.1353	28.1353	29.9846	NCT
A5	UNKNOWN	FAM	Leaves	12H	HKG	25.9503		Root	Ctrl	26	30.6995	30.7552	32.7631	30.5323	29.6822	30.5701	30.4438	30.4438	30.0704	NCT
A6	UNKNOWN	FAM	Leaves	12H	HKG	25.9648		Root	12H	26	31.129	31.0331	32.4653	30.3903	29.4463	31.3891	30.006	30.006	31.2126	NCT
A7	UNKNOWN	FAM	Leaves	24H	HKG	26.007		Root	24H	26	31.0483	31.1145	32.1893	30.3479	30.6662	30.828	29.5773	29.5773	31.0596	NCT
A8	UNKNOWN	FAM	Leaves	24H	HKG	25.9662
A9	UNKNOWN	FAM	Leaves	24H	HKG	26.1665		dCT
A10	UNKNOWN	FAM	Root	Ctrl	HKG	26.0682		Tissue	Case		CaARR01	CaARR02	CaARR03	CaARR04	CaARR05	CaARR06	CaARR07	CaARR08	CaARR09	CaARR10
A11	UNKNOWN	FAM	Root	Ctrl	HKG	26.0878		Leaves	Ctrl	delta CT	-5.28157	-3.86658	-5.73615	-3.80907	-3.56071	-2.5656	-2.97147	-2.97147	-2.92663	0
A12	UNKNOWN	FAM	Root	Ctrl	HKG	25.938		Leaves	12H		-4.9342	-4.21852	-6.06055	-4.0701	-3.49783	-3.19797	-2.97636	-2.97636	-4.48027	0
A13	UNKNOWN	FAM	Root	12H	HKG	25.9452		Leaves	24H		-5.06523	-4.2812	-5.25977	-3.80426	-4.26153	-3.37202	-2.13532	-2.13532	-3.98459	0
A14	UNKNOWN	FAM	Root	12H	HKG	26.038		Root	Ctrl		-4.69951	-4.75524	-6.7631	-4.53232	-3.6822	-4.57006	-4.44383	-4.44383	-4.07039	0
A15	UNKNOWN	FAM	Root	12H	HKG	26.1307		Root	12H		-5.12901	-5.03313	-6.46532	-4.39025	-3.44626	-5.38911	-4.006	-4.006	-5.21257	0
A16	UNKNOWN	FAM	Root	24H	HKG	26.0158		Root	24H		-5.04832	-5.11451	-6.1893	-4.3479	-4.66619	-4.82799	-3.57733	-3.57733	-5.05961	0
A17	UNKNOWN	FAM	Root	24H	HKG	26.0036
A18	UNKNOWN	FAM	Root	24H	HKG	26.0188		FC = 2^-dCT
A19	UNKNOWN	FAM	Leaves	Ctrl	CaARR01	31.5985		Tissue	Case	Fold Change	CaARR01	CaARR02	CaARR03	CaARR04	CaARR05	CaARR06	CaARR07	CaARR08	CaARR09	CaARR10
A20	UNKNOWN	FAM	Leaves	Ctrl	CaARR01	31.2636		Leaves	Ctrl		38.8967	14.5867	53.3033	14.0167	11.8	5.92	7.84333	7.84333	7.60333	0
A21	UNKNOWN	FAM	Leaves	Ctrl	CaARR01	31.4219		Leaves	12H		30.5733	18.6167	66.7433	16.7967	11.2967	9.17667	7.87	7.87	22.32	0
A22	UNKNOWN	FAM	Leaves	12H	CaARR01	31.1867		Leaves	24H		33.48	19.4433	38.3133	13.97	19.18	10.3533	4.39333	4.39333	15.83	0
A23	UNKNOWN	FAM	Leaves	12H	CaARR01	30.8147		Root	Ctrl		25.9833	27.0067	108.617	23.14	12.8367	23.7533	21.7633	21.7633	16.8	0
A24	UNKNOWN	FAM	Leaves	12H	CaARR01	30.8757		Root	12H		34.9933	32.7433	88.36	20.97	10.9	41.9067	16.0667	16.0667	37.08	0
B1	UNKNOWN	FAM	Leaves	24H	CaARR01	30.907		Root	24H		33.09	34.6433	72.9733	20.3633	25.39	28.4033	11.9367	11.9367	33.35	0
B2	UNKNOWN	FAM	Leaves	24H	CaARR01	30.9426
B3	UNKNOWN	FAM	Leaves	24H	CaARR01	31.0096
B4	UNKNOWN	FAM	Root	Ctrl	CaARR01	30.8213
B5	UNKNOWN	FAM	Root	Ctrl	CaARR01	30.8428
B6	UNKNOWN	FAM	Root	Ctrl	CaARR01	30.7602
B7	UNKNOWN	FAM	Root	12H	CaARR01	31.2442
B8	UNKNOWN	FAM	Root	12H	CaARR01	31.1285
B9	UNKNOWN	FAM	Root	12H	CaARR01	31.2103
B10	UNKNOWN	FAM	Root	24H	CaARR01	31.3362
B11	UNKNOWN	FAM	Root	24H	CaARR01	31.0371
B12	UNKNOWN	FAM	Root	24H	CaARR01	31.1176
B13	UNKNOWN	FAM	Leaves	Ctrl	CaARR02	29.6749
B14	UNKNOWN	FAM	Leaves	Ctrl	CaARR02	29.9172
B15	UNKNOWN	FAM	Leaves	Ctrl	CaARR02	29.8132
B16	UNKNOWN	FAM	Leaves	12H	CaARR02	30.4156
B17	UNKNOWN	FAM	Leaves	12H	CaARR02	30.3238
B18	UNKNOWN	FAM	Leaves	12H	CaARR02	30.1188
B19	UNKNOWN	FAM	Leaves	24H	CaARR02	30.1349
B20	UNKNOWN	FAM	Leaves	24H	CaARR02	30.2616
B21	UNKNOWN	FAM	Leaves	24H	CaARR02	30.1075
B22	UNKNOWN	FAM	Root	Ctrl	CaARR02	30.908
B23	UNKNOWN	FAM	Root	Ctrl	CaARR02	30.6069
B24	UNKNOWN	FAM	Root	Ctrl	CaARR02	30.7026
C1	UNKNOWN	FAM	Root	12H	CaARR02	31.1313
C2	UNKNOWN	FAM	Root	12H	CaARR02	30.8849
C3	UNKNOWN	FAM	Root	12H	CaARR02	31.0772
C4	UNKNOWN	FAM	Root	24H	CaARR02	31.1836
C5	UNKNOWN	FAM	Root	24H	CaARR02	31.141
C6	UNKNOWN	FAM	Root	24H	CaARR02	31.1827
C7	UNKNOWN	FAM	Leaves	Ctrl	CaARR03	31.601
C8	UNKNOWN	FAM	Leaves	Ctrl	CaARR03	31.7609
C9	UNKNOWN	FAM	Leaves	Ctrl	CaARR03	31.7908
C10	UNKNOWN	FAM	Leaves	12H	CaARR03	32.1029
C11	UNKNOWN	FAM	Leaves	12H	CaARR03	32.1071
C12	UNKNOWN	FAM	Leaves	12H	CaARR03	31.9336
C13	UNKNOWN	FAM	Leaves	24H	CaARR03	31.195
C14	UNKNOWN	FAM	Leaves	24H	CaARR03	31.184
C15	UNKNOWN	FAM	Leaves	24H	CaARR03	31.2859
C16	UNKNOWN	FAM	Root	Ctrl	CaARR03	32.8128
C17	UNKNOWN	FAM	Root	Ctrl	CaARR03	32.7809
C18	UNKNOWN	FAM	Root	Ctrl	CaARR03	32.7349
C19	UNKNOWN	FAM	Root	12H	CaARR03	32.5179
C20	UNKNOWN	FAM	Root	12H	CaARR03	32.4673
C21	UNKNOWN	FAM	Root	12H	CaARR03	32.4958
C22	UNKNOWN	FAM	Root	24H	CaARR03	32.1864
C23	UNKNOWN	FAM	Root	24H	CaARR03	32.4398
C24	UNKNOWN	FAM	Root	24H	CaARR03	31.9272
D1	UNKNOWN	FAM	Leaves	Ctrl	CaARR04	29.9047
D2	UNKNOWN	FAM	Leaves	Ctrl	CaARR04	29.8076
D3	UNKNOWN	FAM	Leaves	Ctrl	CaARR04	29.7317
D4	UNKNOWN	FAM	Leaves	12H	CaARR04	30.0358
D5	UNKNOWN	FAM	Leaves	12H	CaARR04	30.129
D6	UNKNOWN	FAM	Leaves	12H	CaARR04	30.134
D7	UNKNOWN	FAM	Leaves	24H	CaARR04	29.9866
D8	UNKNOWN	FAM	Leaves	24H	CaARR04	29.7675
D9	UNKNOWN	FAM	Leaves	24H	CaARR04	29.9096
D10	UNKNOWN	FAM	Root	Ctrl	CaARR04	30.4124
D11	UNKNOWN	FAM	Root	Ctrl	CaARR04	30.4449
D12	UNKNOWN	FAM	Root	Ctrl	CaARR04	30.6488
D13	UNKNOWN	FAM	Root	12H	CaARR04	30.2821
D14	UNKNOWN	FAM	Root	12H	CaARR04	30.2115
D15	UNKNOWN	FAM	Root	12H	CaARR04	30.3687
D16	UNKNOWN	FAM	Root	24H	CaARR04	30.7034
D17	UNKNOWN	FAM	Root	24H	CaARR04	30.3519
D18	UNKNOWN	FAM	Root	24H	CaARR04	30.0725
D19	UNKNOWN	FAM	Leaves	Ctrl	CaARR05	29.6765
D20	UNKNOWN	FAM	Leaves	Ctrl	CaARR05	29.5728
D21	UNKNOWN	FAM	Leaves	Ctrl	CaARR05	29.3303
D22	UNKNOWN	FAM	Leaves	12H	CaARR05	29.7127
D23	UNKNOWN	FAM	Leaves	12H	CaARR05	29.6814
D24	UNKNOWN	FAM	Leaves	12H	CaARR05	29.7194
E1	UNKNOWN	FAM	Leaves	24H	CaARR05	30.7867
E2	UNKNOWN	FAM	Leaves	24H	CaARR05	29.9577
E3	UNKNOWN	FAM	Leaves	24H	CaARR05	30.3183
E4	UNKNOWN	FAM	Root	Ctrl	CaARR05	29.6051
E5	UNKNOWN	FAM	Root	Ctrl	CaARR05	29.7443
E6	UNKNOWN	FAM	Root	Ctrl	CaARR05	29.5036
E7	UNKNOWN	FAM	Root	12H	CaARR05	29.4046
E8	UNKNOWN	FAM	Root	12H	CaARR05	29.6138
E9	UNKNOWN	FAM	Root	12H	CaARR05	29.423
E10	UNKNOWN	FAM	Root	24H	CaARR05	30.4131
E11	UNKNOWN	FAM	Root	24H	CaARR05	30.9952
E12	UNKNOWN	FAM	Root	24H	CaARR05	30.5
E13	UNKNOWN	FAM	Leaves	Ctrl	CaARR06	28.4941
E14	UNKNOWN	FAM	Leaves	Ctrl	CaARR06	28.5695
E15	UNKNOWN	FAM	Leaves	Ctrl	CaARR06	28.5427
E16	UNKNOWN	FAM	Leaves	12H	CaARR06	29.1659
E17	UNKNOWN	FAM	Leaves	12H	CaARR06	29.1599
E18	UNKNOWN	FAM	Leaves	12H	CaARR06	29.3511
E19	UNKNOWN	FAM	Leaves	24H	CaARR06	29.3279
E20	UNKNOWN	FAM	Leaves	24H	CaARR06	29.2797
E21	UNKNOWN	FAM	Leaves	24H	CaARR06	29.3452
E22	UNKNOWN	FAM	Root	Ctrl	CaARR06	30.6903
E23	UNKNOWN	FAM	Root	Ctrl	CaARR06	30.4115
E24	UNKNOWN	FAM	Root	Ctrl	CaARR06	30.565
F1	UNKNOWN	FAM	Root	12H	CaARR06	31.2164
F2	UNKNOWN	FAM	Root	12H	CaARR06	31.5794
F3	UNKNOWN	FAM	Root	12H	CaARR06	31.2949
F4	UNKNOWN	FAM	Root	24H	CaARR06	30.95
F5	UNKNOWN	FAM	Root	24H	CaARR06	30.785
F6	UNKNOWN	FAM	Root	24H	CaARR06	31.0222
F7	UNKNOWN	FAM	Leaves	Ctrl	CaARR07	29.0973
F8	UNKNOWN	FAM	Leaves	Ctrl	CaARR07	28.8974
F9	UNKNOWN	FAM	Leaves	Ctrl	CaARR07	28.9134
F10	UNKNOWN	FAM	Leaves	12H	CaARR07	29.3356
F11	UNKNOWN	FAM	Leaves	12H	CaARR07	28.9805
F12	UNKNOWN	FAM	Leaves	12H	CaARR07	29.1734
F13	UNKNOWN	FAM	Leaves	24H	CaARR07	28.2303
F14	UNKNOWN	FAM	Leaves	24H	CaARR07	28.1517
F15	UNKNOWN	FAM	Leaves	24H	CaARR07	27.9065
F16	UNKNOWN	FAM	Root	Ctrl	CaARR07	30.5961
F17	UNKNOWN	FAM	Root	Ctrl	CaARR07	30.3233
F18	UNKNOWN	FAM	Root	Ctrl	CaARR07	30.2581
F19	UNKNOWN	FAM	Root	12H	CaARR07	29.8863
F20	UNKNOWN	FAM	Root	12H	CaARR07	29.9797
F21	UNKNOWN	FAM	Root	12H	CaARR07	29.921
F22	UNKNOWN	FAM	Root	24H	CaARR07	29.5633
F23	UNKNOWN	FAM	Root	24H	CaARR07	29.7972
F24	UNKNOWN	FAM	Root	24H	CaARR07	29.4765
G1	UNKNOWN	FAM	Leaves	Ctrl	CaARR08	29.2653
G2	UNKNOWN	FAM	Leaves	Ctrl	CaARR08	28.8885
G3	UNKNOWN	FAM	Leaves	Ctrl	CaARR08	28.7818
G4	UNKNOWN	FAM	Leaves	12H	CaARR08	28.776
G5	UNKNOWN	FAM	Leaves	12H	CaARR08	28.8971
G6	UNKNOWN	FAM	Leaves	12H	CaARR08	29.0253
G7	UNKNOWN	FAM	Leaves	24H	CaARR08	28.2073
G8	UNKNOWN	FAM	Leaves	24H	CaARR08	28.143
G9	UNKNOWN	FAM	Leaves	24H	CaARR08	28.4161
G10	UNKNOWN	FAM	Root	Ctrl	CaARR08	30.3581
G11	UNKNOWN	FAM	Root	Ctrl	CaARR08	30.6221
G12	UNKNOWN	FAM	Root	Ctrl	CaARR08	30.4442
G13	UNKNOWN	FAM	Root	12H	CaARR08	30.0984
G14	UNKNOWN	FAM	Root	12H	CaARR08	30.038
G15	UNKNOWN	FAM	Root	12H	CaARR08	29.9147
G16	UNKNOWN	FAM	Root	24H	CaARR08	29.494
G17	UNKNOWN	FAM	Root	24H	CaARR08	29.7503
G18	UNKNOWN	FAM	Root	24H	CaARR08	29.7516
G19	UNKNOWN	FAM	Leaves	Ctrl	CaARR09	28.9894
G20	UNKNOWN	FAM	Leaves	Ctrl	CaARR09	28.7945
G21	UNKNOWN	FAM	Leaves	Ctrl	CaARR09	28.8955
G22	UNKNOWN	FAM	Leaves	12H	CaARR09	30.3987
G23	UNKNOWN	FAM	Leaves	12H	CaARR09	30.4425
G24	UNKNOWN	FAM	Leaves	12H	CaARR09	30.5039
H1	UNKNOWN	FAM	Leaves	24H	CaARR09	30.0188
H2	UNKNOWN	FAM	Leaves	24H	CaARR09	30.0693
H3	UNKNOWN	FAM	Leaves	24H	CaARR09	29.8918
H4	UNKNOWN	FAM	Root	Ctrl	CaARR09	29.9714
H5	UNKNOWN	FAM	Root	Ctrl	CaARR09	30.1384
H6	UNKNOWN	FAM	Root	Ctrl	CaARR09	29.9899
H7	UNKNOWN	FAM	Root	12H	CaARR09	31.1349
H8	UNKNOWN	FAM	Root	12H	CaARR09	31.261
H9	UNKNOWN	FAM	Root	12H	CaARR09	31.2216
H10	UNKNOWN	FAM	Root	24H	CaARR09	31.0191
H11	UNKNOWN	FAM	Root	24H	CaARR09	31.1209
H12	UNKNOWN	FAM	Root	24H	CaARR09	31.2209
H13	UNKNOWN	FAM	Leaves	Ctrl	CaARR10	NCT
H14	UNKNOWN	FAM	Leaves	Ctrl	CaARR10	NCT
H15	UNKNOWN	FAM	Leaves	Ctrl	CaARR10	NCT
H16	UNKNOWN	FAM	Leaves	12H	CaARR10	NCT
H17	UNKNOWN	FAM	Leaves	12H	CaARR10	NCT
H18	UNKNOWN	FAM	Leaves	12H	CaARR10	NCT
H19	UNKNOWN	FAM	Leaves	24H	CaARR10	NCT
H20	UNKNOWN	FAM	Leaves	24H	CaARR10	NCT
H21	UNKNOWN	FAM	Leaves	24H	CaARR10	NCT
H22	UNKNOWN	FAM	Root	Ctrl	CaARR10	NCT
H23	UNKNOWN	FAM	Root	Ctrl	CaARR10	NCT
H24	UNKNOWN	FAM	Root	Ctrl	CaARR10	NCT
I1	UNKNOWN	FAM	Root	12H	CaARR10	NCT
I2	UNKNOWN	FAM	Root	12H	CaARR10	NCT
I3	UNKNOWN	FAM	Root	12H	CaARR10	NCT
I4	UNKNOWN	FAM	Root	24H	CaARR10	NCT
I5	UNKNOWN	FAM	Root	24H	CaARR10	NCT
I6	UNKNOWN	FAM	Root	24H	CaARR10	NCT
